# Supplementary material for: Effect of Evening Primrose (Oenothera biennis) Oil Cake on the Properties of Polyurethane/Polyisocyanurate Bio-Composites
Source: MDPI journal article supplement (doi:10.3390/ijms22168950), 2021-08-19
Supplement: s1 [file s1]

# Effect of evening primrose (*Oenothera biennis*) oil cake on the properties of polyurethane/polyisocyanurate bio-composites

Joanna Paciorek-Sadowska, Marcin Borowicz and Marek Isbrandt

**Table S1.** TGA results of foams modified by EPC and reference foam without EPC.

| Sample | T <sub>5</sub><br>(°C) | T <sub>10</sub><br>(°C) | T <sub>max</sub><br>(°C) | The highest mass<br>loss (%/°C) | The highest<br>mass loss<br>rate (%/min) | Residue<br>(%) |
|--------|------------------------|-------------------------|--------------------------|---------------------------------|------------------------------------------|----------------|
| EPC0   | 222                    | 254                     | 342                      | 0.47                            | 4.7                                      | 21             |
| EPC5   | 196                    | 243                     | 337                      | 0.47                            | 4.7                                      | 16             |
| EPC10  | 188                    | 232                     | 335                      | 0.49                            | 4.9                                      | 16             |
| EPC15  | 186                    | 225                     | 335                      | 0.50                            | 5.0                                      | 15             |
| EPC20  | 181                    | 218                     | 335                      | 0.52                            | 5.2                                      | 15             |
| EPC25  | 175                    | 211                     | 334                      | 0.53                            | 5.3                                      | 15             |
| EPC30  | 168                    | 207                     | 334                      | 0.54                            | 5.4                                      | 14             |
| EPC35  | 160                    | 203                     | 333                      | 0.55                            | 5.5                                      | 14             |
| EPC40  | 153                    | 199                     | 332                      | 0.57                            | 5.7                                      | 13             |
| EPC45  | 149                    | 196                     | 332                      | 0.58                            | 5.8                                      | 13             |
| EPC50  | 145                    | 191                     | 332                      | 0.59                            | 5.9                                      | 12             |

**Table S2.** DSC results of EPC0, EPC5 and EPC50 foams.

| Foam  | Peak P1                     |                           |                              |                         | Peak P2                     |                           |                              |                         | Peak P3                     |                           |                              |                         |
|-------|-----------------------------|---------------------------|------------------------------|-------------------------|-----------------------------|---------------------------|------------------------------|-------------------------|-----------------------------|---------------------------|------------------------------|-------------------------|
|       | T <sub>onset1</sub><br>(°C) | T <sub>max1</sub><br>(°C) | T <sub>offset1</sub><br>(°C) | H <sub>1</sub><br>(J/g) | T <sub>onset2</sub><br>(°C) | T <sub>max2</sub><br>(°C) | T <sub>offset2</sub><br>(°C) | H <sub>2</sub><br>(J/g) | T <sub>onset3</sub><br>(°C) | T <sub>max3</sub><br>(°C) | T <sub>offset3</sub><br>(°C) | H <sub>3</sub><br>(J/g) |
| EPC0  | 41.2                        | 98.5                      | 155.1                        | 68.2                    | 191.1                       | 249.2                     | 322.1                        | 55.9                    | 322.9                       | 347.4                     | 361.5                        | 9.9                     |
| EPC5  | 12.4                        | 79.2                      | 135.5                        | 90.3                    | 260.9                       | 292.7                     | 322.8                        | 43.5                    | 322.8                       | 336.8                     | 350.1                        | 14.2                    |
| EPC50 | 2.9                         | 99.9                      | 176.1                        | 29.5                    | 185.2                       | 254.1                     | 305.7                        | 20.1                    | 306.5                       | 324.8                     | 340.9                        | 4.9                     |
